# Supplementary material for: Immunogenicity after a Third COVID-19 mRNA Booster in Solid Cancer Patients Who Previously Received the Primary Heterologous CoronaVac/ChAdOx1 Vaccine
Source: MDPI journal article supplement (doi:10.3390/vaccines10101613), 2022-09-26
Supplement: s1 [file s1]

## Table of Contents

| Contents                                                                                                                      | Page |
|-------------------------------------------------------------------------------------------------------------------------------|------|
| <b>Supplemental tables</b>                                                                                                    |      |
| Table S1: Clinical characteristics of patients with inadequate antibody response defined by anti-RBD IgG less than 300 BAU/ml | 2    |
| Table S2: Post-third dose levels of SAR-CoV2 binding antibody stratified by clinical factors                                  | 3    |
| Table S3: Vaccine-related reactogenicity compared between CoronaVac/ChAdOx1/mRNA and ChAdOx1/ChAdOx1/mRNA vaccine scheme      | 4    |
| Table S4: Demographics and clinical characteristics of samples performed omicron neutralization                               | 5    |

**Table S1.** Clinical characteristics of patients with inadequate antibody response defined by anti-RBD IgG less than 300 BAU/ml.

| No | Age | Sex    | Cancer Types                           | Treatment                                                                                             | Co-morbidity                           | Anti-RBD IgG (BAU/ml) pre-third dose | Anti-RBD IgG (BAU/ml) post-third dose | Steroid use         |
|----|-----|--------|----------------------------------------|-------------------------------------------------------------------------------------------------------|----------------------------------------|--------------------------------------|---------------------------------------|---------------------|
| 1  | 53  | Female | Breast T2N1M0                          | Adjuvant doxorubicin/cyclophosphamide 4 cycles followed by weekly paclitaxel and trastuzumab          | No                                     | 48.14                                | 42.80                                 | Pre-medication      |
| 2  | 72  | Male   | Locally advanced nasopharyngeal cancer | Induction cisplatin/5-FU for 3 cycles then concurrent chemoradiation with cisplatin/5-FU for 3 cycles | No                                     | 12.13                                | 54.83                                 | Pre-medication      |
| 3  | 63  | Female | Recurrent colon cancer                 | Palliative oxaliplatin/5-FU                                                                           | DM, HT, Congenital adrenal hyperplasia | 4.25                                 | 103.22                                | Therapeutic steroid |
| 4  | 65  | Female | Recurrent colon cancer                 | Palliative second-line irinotecan/5-FU                                                                | DM, HT                                 | 55.04                                | 228.29                                | Pre-medication      |

**Table S2.** Post-third dose levels of SAR-CoV2 binding antibody stratified by clinical factors.

| Clinical factors                | Cancer patient<br>CoronaVac-ChAdOx1 | GMT (95%CI)<br>at post-third dose | <i>p</i> -value |
|---------------------------------|-------------------------------------|-----------------------------------|-----------------|
| <b>Overall</b>                  | <b>(n= 44)</b>                      | 2329.63 (1487.4-3648.76)          |                 |
| <b>Age, years, median (IQR)</b> | 57 (48.5-65)                        |                                   |                 |
| <60 years                       | 24 (55%)                            | 3267.02 (1888.09-5653.04)         | 0.131           |
| ≥60 years                       | 20 (45%)                            | 1552.56 (733.16-3287.75)          |                 |
| <b>Sex</b>                      |                                     |                                   |                 |
| Female                          | 24 (55%)                            | 2476.88 (1293.16-4744.12)         | 0.588           |
| Male                            | 20 (45%)                            | 2164.44 (1107.28-4230.93)         |                 |
| <b>Cancer types</b>             |                                     |                                   |                 |
| Breast                          | 18 (41%)                            | 2925.42 (1426.37-5999.91)         | 0.646           |
| Colorectal                      | 11 (25%)                            | 1940.81 (758.45-4966.34)          |                 |
| Head Neck                       | 6 (14%)                             | 762.08 (132.26-4391.02)           |                 |
| Hepato-Biliary-Pancreatic       | 4 (9%)                              | 2114.43 (230.73-19377.07)         |                 |
| Esophagus/Gastric/Genitourinary | 5 (11%)                             | 6334.79 (1569.76-25564.12)        |                 |
| <b>Cancer treatment</b>         |                                     |                                   |                 |
| Chemotherapy                    | 29 (66%)                            | 1558.22 (851.37-2851.94)          | <b>0.013</b>    |
| Hormonal therapy/Biologics      | 15 (34%)                            | 5069.41 (3236.82-7939.57)         |                 |
| <b>Corticosteroid</b>           |                                     |                                   |                 |
| no/pre-medication               | 41 (93%)                            | 2460.75 (1570.16-3856.47)         | 0.625           |
| therapeutic purpose             | 3 (7%)                              | 1102.28 (3.43-354531.6)           |                 |
| <b>Disease status</b>           |                                     |                                   |                 |
| Early                           | 20 (45%)                            | 3055.02 (1629.83-5726.45)         | 0.664           |
| Locally advanced                | 8 (18%)                             | 1809.22 (448.38-7300.28)          |                 |
| De novo metastasis              | 10 (23%)                            | 2810.11 (1146.55-6887.38)         |                 |
| Recurrence                      | 6 (14%)                             | 967.24 (126.31-7406.61)           |                 |
| <b>Co-morbidity</b>             |                                     |                                   |                 |
| Diabetes                        | 6 (14%)                             | 1487.06 (226.3-9771.71)           | 0.473           |
| Hypertension                    | 12 (27%)                            | 1762.26 (661.69-4693.39)          | 0.343           |
| <b>Type of third vaccine</b>    |                                     |                                   |                 |
| BNT162b2 (Pfizer)               | 20 (45%)                            | 2037.04 (1028.7-4033.76)          | 0.540           |
| mRNA-1273 (Moderna)             | 24 (55%)                            | 2605.31 (1376.54-4930.96)         |                 |

**Table S3.** Vaccine-related reactogenicity compared between CoronaVac/ChAdOx1/mRNA and ChAdOx1/ChAdOx1/mRNA vaccine scheme.

|                           | CoronaVac/ChAdOx1/mRNA (n=42) |          |              |            | ChAdOx1/ChAdOx1/mRNA (n=86) |          |              |            | <i>p</i> -value* |
|---------------------------|-------------------------------|----------|--------------|------------|-----------------------------|----------|--------------|------------|------------------|
|                           | n (%)                         | Mild (%) | Moderate (%) | Severe (%) | n (%)                       | Mild (%) | Moderate (%) | Severe (%) |                  |
| <b>Any reactions</b>      | 20 (48)                       |          |              |            | 56 (65)                     |          |              |            | 0.058            |
| <b>Local reactions</b>    |                               |          |              |            |                             |          |              |            |                  |
| Pain                      | 20 (48)                       | 9 (21)   | 11 (26)      | 0 (0)      | 54 (63)                     | 26 (30)  | 28 (33)      | 0 (0)      | 0.103            |
| Tenderness                | 15 (36)                       | 8 (19)   | 7 (17)       | 0 (0)      | 50 (58)                     | 30 (35)  | 20 (23)      | 0 (0)      | <b>0.017</b>     |
| Induration                | 5 (12)                        | 5 (12)   | 0 (0)        | 0 (0)      | 19 (22)                     | 16 (19)  | 3 (3)        | 0 (0)      | 0.166            |
| Erythema                  | 1 (2)                         | 0 (0)    | 1 (2)        | 0 (0)      | 2 (2)                       | 2 (2)    | 0 (0)        | 0 (0)      | 0.984            |
| <b>Systemic reactions</b> |                               |          |              |            |                             |          |              |            |                  |
| Fever                     | 2 (5)                         | 1 (2)    | 1 (2)        | 0 (0)      | 11 (13)                     | 8 (9)    | 2 (2)        | 1 (1)      | 0.219            |
| Headache                  | 7 (17)                        | 2 (5)    | 5 (12)       | 0 (0)      | 27 (31)                     | 14 (16)  | 13 (15)      | 0 (0)      | 0.076            |
| Myalgia                   | 11 (26)                       | 7 (17)   | 4 (10)       | 0 (0)      | 37 (43)                     | 27 (31)  | 9 (10)       | 1 (1)      | 0.065            |
| Fatigue                   | 8 (19)                        | 6 (14)   | 2 (5)        | 0 (0)      | 33 (38)                     | 31 (36)  | 2 (2)        | 0 (0)      | <b>0.028</b>     |
| Nausea/vomitting          | 0 (0)                         | 0 (0)    | 0 (0)        | 0 (0)      | 5 (6)                       | 5 (6)    | 0 (0)        | 0 (0)      | 0.171            |
| Diarrhea                  | 3 (7)                         | 3 (7)    | 0 (0)        | 0 (0)      | 5 (6)                       | 5 (6)    | 0 (0)        | 0 (0)      | 0.717            |
| Arthralgia                | 5 (12)                        | 5 (12)   | 0 (0)        | 0 (0)      | 8 (9)                       | 6 (7)    | 1 (1)        | 1 (1)      | 0.757            |
| Lymphadenopathy           | 5 (12)                        | 5 (12)   | 0 (0)        | 0          | 1 (1)                       | 1 (1)    | 0 (0)        | 0 (0)      | <b>0.014</b>     |

\* comparison of adverse reaction events between two vaccination regimens

**Table S4.** Demographics and clinical characteristics of samples performed omicron neutralization.

| Primary series of vaccination                                | Cancer patient<br>CoronaVac-ChAdOx1<br>(n= 44) | Cancer patient<br>ChAdOx1-ChAdOx1<br>(n= 40) |
|--------------------------------------------------------------|------------------------------------------------|----------------------------------------------|
| Age, years, median (IQR)                                     | 57 (48.5-65)                                   | 56.5 (50-64)                                 |
| <b>Sex</b>                                                   |                                                |                                              |
| Female                                                       | 24 (55%)                                       | 23 (58%)                                     |
| Male                                                         | 20 (45%)                                       | 17 (43%)                                     |
| <b>BMI, kg/m2, median (IQR)</b>                              | 21.7 (19.5-25.5)                               | 22.4 (19.8-25.6)                             |
| <b>Cancer types</b>                                          |                                                |                                              |
| Breast                                                       | 18 (41%)                                       | 21 (53%)                                     |
| Colorectal                                                   | 11 (25%)                                       | 12 (30%)                                     |
| Head Neck                                                    | 6 (14%)                                        | 0 (0%)                                       |
| Hepato-Biliary-Pancreatic                                    | 4 (9%)                                         | 2 (5%)                                       |
| Esophagus/Gastric                                            | 3 (7%)                                         | 1 (3%)                                       |
| Genitourinary                                                | 2 (5%)                                         | 1 (3%)                                       |
| Lung                                                         | 0 (0%)                                         | 3 (8%)                                       |
| Other                                                        | 0 (0%)                                         | 0 (0%)                                       |
| <b>Cancer treatment before third dose</b>                    |                                                |                                              |
| Chemotherapy                                                 | 29 (66%)                                       | 23 (58%)                                     |
| Hormonal therapy/Biologics                                   | 15 (34%)                                       | 17 (43%)                                     |
| <b>Corticosteroid</b>                                        |                                                |                                              |
| No/pre-medication                                            | 41 (93%)                                       | 40 (100%)                                    |
| Therapeutic purpose                                          | 3 (7%)                                         | 0 (0%)                                       |
| <b>Disease status</b>                                        |                                                |                                              |
| Early                                                        | 20 (45%)                                       | 20 (50%)                                     |
| Locally advanced                                             | 8 (18%)                                        | 5 (13%)                                      |
| De novo metastasis                                           | 10 (23%)                                       | 12 (30%)                                     |
| Recurrence                                                   | 6 (14%)                                        | 3 (8%)                                       |
| <b>Co-morbidity</b>                                          |                                                |                                              |
| Diabetes                                                     | 6 (14%)                                        | 7 (18%)                                      |
| Hypertension                                                 | 12 (27%)                                       | 8 (20%)                                      |
| Cardiovascular disease                                       | 3 (7%)                                         | 1 (3%)                                       |
| Respiratory tract disease                                    | 1 (2%)                                         | 2 (5%)                                       |
| <b>Interval between first to second vaccine, days</b>        | 24 (21-28)                                     | 70 (56-84)                                   |
| <b>Interval between second to third vaccine, days</b>        | 127.5 (113.5-137)                              | 115.5 (103.5-135)                            |
| <b>Interval between third dose to blood collection, days</b> | 14 (14-14)                                     | 14 (14-14)                                   |
| <b>Type of third vaccine</b>                                 |                                                |                                              |
| BNT162b2 (Pfizer)                                            | 20 (45%)                                       | 17 (43%)                                     |
| mRNA-1273 (Moderna)                                          | 24 (55%)                                       | 23 (58%)                                     |
